# Supplementary material for: Enhanced electrochemical CO2-to-ethylene conversion through second-shell coordination on a Cu single-atom catalyst
Source: Royal Society of Chemistry journal article supplement (doi:10.1039/d3ta08073k), 2024-01-01
Supplement: d3ta08073k1.pdf [file d3ta08073k1.pdf]

1

## *Supporting Information*

# 2 **Enhanced Electrochemical CO<sub>2</sub>-to-Ethylene Conversion** 3 **through Second-Shell Coordination on Cu Single-Atom** 4 **Catalyst**

5 Yi Shen<sup>[a,b]\*</sup>, Yongliang Pan<sup>[a]</sup>, Huanyong Xiao<sup>[a]</sup>, Haizhong Zhang<sup>[a]</sup>, Chao Zhu<sup>[a]\*</sup>,  
6 Qile Fang<sup>[c]</sup>, Yungui Li<sup>[d]</sup>, Lun Lu<sup>[e]</sup>, Liquan Ye<sup>[f]</sup>, Shuang Song<sup>[a]</sup>

7

8 [a] College of Environment, Zhejiang University of Technology, Hangzhou, 310032,  
9 P. R. China;

10 [b] Shaoxing Research Institute, Zhejiang University of Technology, Shaoxing, 312000,  
11 P. R. China;

12 [c] Advanced Institute of Natural Sciences, Beijing Normal University at Zhuhai,  
13 Zhuhai, 519087, P. R. China;

14 [d] Sichuan Provincial Sci-Tech Cooperation Base of Low-cost Wastewater Treatment  
15 Technology, Department of Environmental Engineering, Southwest University of  
16 Science and Technology, Mianyang, 621010, P. R. China;

17 [e] State Environmental Protection Key Laboratory of Environmental Pollution Health  
18 Risk Assessment, South China Institute of Environmental Sciences, Ministry of  
19 Ecology and Environment, Guangzhou, 510655, P. R. China.

20 [f] College of Materials and Chemical Engineering, Key Laboratory of Inorganic  
21 Nonmetallic Crystalline and Energy Conversion Materials, China Three Gorges  
22 University, Yichang, 443002, P. R. China.

23

24

25 \*Corresponding Author Prof. Yi Shen, Chao Zhu. Email: [shenyi@zjut.edu.cn](mailto:shenyi@zjut.edu.cn),  
26 [zhuchao@zjut.edu.cn](mailto:zhuchao@zjut.edu.cn). Fax: +86-571-88320276; Tel: +86-571-88320726.

## 27 **Experimental Section**

### 28 **Synthesis of g-C<sub>3</sub>N<sub>4</sub>**

29 The g-C<sub>3</sub>N<sub>4</sub> was prepared following a typical thermal polymerization procedure.  
30 Briefly, 15 g of urea was put into a covered crucible and then heated to 600 °C at a  
31 ramp rate of 5 °C/min in a muffle furnace. It was maintained at this temperature for an  
32 additional 2 h. After being cooled down to room temperature, the resultant powders  
33 (about 500 mg) were ultrasonicated with deionized water, collected by filtration, and  
34 finally dried under vacuum at 60 °C.

### 35 **Synthesis of heteroatom-doped g-C<sub>3</sub>N<sub>4</sub>**

36 Heteroatom-doped g-C<sub>3</sub>N<sub>4</sub> was synthesized through a typical procedure. Take  
37 C<sub>3</sub>N<sub>4</sub>-S for example, pristine g-C<sub>3</sub>N<sub>4</sub> (0.2 g) and sulfur powder (0.01 g) were ground in  
38 an agate mortar for 30 min. The mixture was then pressed in a tube furnace and reacted  
39 at 550 °C for 2 h with a heating rate of 2 °C/min and the Ar gas (purity > 99.999%)  
40 flow of 0.1 L/min. The end of the tube furnace was connected to a gas bottle containing  
41 ethanol in case of a trace amount of volatile gas. After cooling to room temperature, the  
42 resulting powder was filtered and washed successively with deionized water and  
43 alcohol, and dried in a vacuum at 60 °C. The C<sub>3</sub>N<sub>4</sub>-B and C<sub>3</sub>N<sub>4</sub>-P samples were  
44 synthesized by the same method as above, except that the sulfur powder was replaced  
45 by the boron powder and sodium hypophosphite (NaH<sub>2</sub>PO<sub>2</sub>·H<sub>2</sub>O), respectively.

### 46 **Preparation of Cu-C<sub>3</sub>N<sub>4</sub>-X**

47 In a typical synthesis, an aqueous suspension of C<sub>3</sub>N<sub>4</sub>-S (approximately 2.5  
48 mg·mL<sup>-1</sup>) was first prepared by dispersing 150mg C<sub>3</sub>N<sub>4</sub>-S into 60 mL deionized water  
49 with sonication and was then kept stirring continuously. Preparation of copper chloride  
50 aqueous suspension, dissolving 46 mg Copric chloride dihydrate (approximately 1.15  
51 mg·mL<sup>-1</sup>) into 40 mL deionized water with sonication. Then, added copper chloride  
52 aqueous suspension dropwise to C<sub>3</sub>N<sub>4</sub>-S aqueous suspension and kept stirring for 24 h  
53 to form a homogeneous solution. After the impregnation step, the resulting  
54 homogeneous solution was filtered and washed successively with alcohol and deionized  
55 water, and dried in a vacuum at 60 °C. To prepare the Cu-C<sub>3</sub>N<sub>4</sub>-S sample, the obtained

56 impregnated sample was placed in the tube furnace and annealed at 550 °C for 2 h with  
57 the heating rate of 2 °C/min and the Ar atmosphere. The Cu-C<sub>3</sub>N<sub>4</sub>-B and Cu-C<sub>3</sub>N<sub>4</sub>-P  
58 samples were synthesized by the same method as above, except that the C<sub>3</sub>N<sub>4</sub>-S were  
59 replaced by C<sub>3</sub>N<sub>4</sub>-B and C<sub>3</sub>N<sub>4</sub>-P, respectively.

#### 60 **Preparation of Cu<sub>x</sub>%-C<sub>3</sub>N<sub>4</sub>-S**

61 The Cu<sub>x</sub>%-C<sub>3</sub>N<sub>4</sub>-S was obtained by continuing to follow the preparation steps of  
62 C<sub>3</sub>N<sub>4</sub>-S based on the Cu-C<sub>3</sub>N<sub>4</sub>-S prepared in the previous steps. But the proportion of  
63 Cu element into C<sub>3</sub>N<sub>4</sub>-S changed to 2%, 5%, and 15%. To facilitate the discussion,  
64 Cu<sub>x</sub>%-C<sub>3</sub>N<sub>4</sub>-S were named according to the ratio of Cu element to C<sub>3</sub>N<sub>4</sub>-S in the catalyst.

#### 65 **Characterization of Cu-C<sub>3</sub>N<sub>4</sub>-S, Cu-C<sub>3</sub>N<sub>4</sub>-B, Cu-C<sub>3</sub>N<sub>4</sub>-P, Cu-C<sub>3</sub>N<sub>4</sub> and C<sub>3</sub>N<sub>4</sub>**

66 Field emission scanning electron microscopy (FESEM) was utilized to show the  
67 structure of the catalysts on the Regulus8100 and the accelerating voltage was set as 15  
68 kV. Furthermore, high-resolution transmission electron microscopy (HRTEM) and  
69 energy dispersive X-Ray (EDX) elemental mapping were used to characterize the  
70 morphologies of the catalysts and spatial distribution of elements on a JEM-F200 with  
71 an accelerating voltage of 300 kV. Powder X-ray diffraction (XRD) measurements  
72 were performed on a Smart Lab SE diffractometer using Cu targets (tube voltage: 40  
73 kV, current: 30 mA). The functional group structure was measured by Fourier transform  
74 infrared spectroscopy (FT-IR). Inductively coupled plasma optical emission  
75 spectrometer (ICP-OES) results were obtained by assays from Agilent 5110  
76 instruments. High-angle annular dark-field scanning transmission electron microscopy  
77 (HAADF-STEM) was performed using a state-of-the-art transmission electron  
78 microscope equipped with double (image and probe) spherical aberration (Cs) correctors  
79 (Thermo Scientific Spectra 300). X-ray photoelectron spectroscopy (XPS) spectra were  
80 collected with an ESCALAB 250Xi instrument using an Al K $\alpha$  X-ray as an excitation  
81 source. In situ Raman was conducted on a HORIBA LabRAM HR Evolution Raman  
82 spectrometer with a 532 nm solid laser as an excitation source. The measurements were  
83 carried out in a home-made flow cell with a quartz window to detect the signal from  
84 cathode GDE. The Cu K-edge X-ray absorption near edge structure (XANES)

85 measurements was performed on a laboratory device (easyXAFS300, easyXAFS LLC),  
86 which was based on Rowland circle geometries with spherically bent crystal analyzers  
87 (SBCA) and operated using an Ag X-ray tube source and a silicon drift detector  
88 (AXAS-M1, KETEK GmbH).

### 89 **CO<sub>2</sub> reduction reaction measurements**

90 Electrochemical measurements were conducted using a CHI760E electrochemical  
91 station (China) within a reactor featuring two electrode chambers separated by an ion  
92 exchange membrane, equipped with three electrodes. The cathode and anode electrodes  
93 consisted of carbon paper (2 cm × 2 cm) with catalyst and nickel foam (2 cm × 2 cm),  
94 respectively. A reference electrode of Ag/AgCl (3.5 M KCl) was employed. The  
95 catalyst ink, fully dispersed, was prepared by ultrasonically vibrating a mixture of  
96 catalyst (3 mg), absolute ethanol (300 μL, YongDa, China), and Nafion (50 μL, HeSen,  
97 China) for 30 minutes. Cathode electrodes were then fabricated by evenly spreading  
98 100 μL of the catalyst ink onto carbon paper and drying it overnight under vacuum. The  
99 electrode potentials were converted from the reversible hydrogen electrode (RHE)  
100 reference:

$$101 \quad E(\text{vs. RHE}) = E(\text{vs. Ag/AgCl}) + 0.0591 \times \text{pH} + 0.197$$

102 To assess the Faradaic efficiencies (FEs) of the CO<sub>2</sub>RR products,  
103 chronoamperometry was conducted for 8000 s at a range of potentials (typically, at -  
104 0.8, -1.0, -1.1, -1.2, -1.3, -1.4 V). Gas products were analyzed every 30-minute intervals  
105 during the CO<sub>2</sub>RR and after the reaction by Gas Chromatography (GC), and the average  
106 value of the whole process was adopted. Liquid products were analyzed after reaction  
107 by <sup>1</sup>H nuclear magnetic resonance (NMR) spectroscopy. Linear sweep voltammetry  
108 (LSV) was carried out from 1.6 V to -1.4 V vs. RHE in CO<sub>2</sub>-saturated 0.1 M KHCO<sub>3</sub>  
109 to evaluate CO<sub>2</sub>RR activity. Stability tests were conducted in a 0.1 M KHCO<sub>2</sub>  
110 electrolyte solution saturated with CO<sub>2</sub> at -0.9 V vs. RHE for 1440 min. During the  
111 stability test, CO<sub>2</sub> was kept purging into the cathodic room at 10 sccm with stirring at  
112 500 rpm. C<sub>2</sub>H<sub>4</sub> production was monitored by GC every 30 min. Cyclic voltammograms  
113 (CV) measurements were conducted at various scan rates (100, 130, 160, 190, 210  
114 mV·s<sup>-1</sup>) within the potential windows of open circuit voltage (± 0.3 V) (vs. Ag/AgCl).

115 By plotting the  $\Delta j$  (the difference between cathodic and anodic current density) against  
116 the scan rate at open circuit voltage (vs Ag/AgCl). The double layer capacitance ( $C_{dl}$ )  
117 could be obtained from half of the corresponding slope value.

118 Faraday efficiency (FE) calculation formula for a gas product was as follows:

$$119 \quad FE_g = \frac{Q_g}{Q_{total}} \times 100\% = \frac{\frac{v}{60 \text{ s/min}} \times \frac{y}{24.5 \text{ L/mol}} \times n \times F}{j_{average}} \times 100\%$$

120 where  $v$  is the flow rate of  $\text{CO}_2$  gas, controlled by the gas flow meter at 10 sccm;  
121  $y$  is the volume percentage of the target component in the exhaust gas obtained by gas  
122 chromatography; for gas phase reduction products  $\text{H}_2$ ,  $\text{CO}$ ,  $\text{CH}_4$ , and  $\text{C}_2\text{H}_4$ ,  $n$  is 2, 2, 8  
123 and 12 respectively;  $F$  is Faraday constant ( $F = 96485.3 \text{ C mol}^{-1}$ );  $j_{average}$  is the average  
124 current.

125

## 126 **Computation details**

127 DFT calculations were performed using the Vienna Ab-initio Simulation Package  
128 (VASP).[1, 2] The Perdew-Burke-Ernzerhof (PBE) functional within the generalized  
129 gradient approximation (GGA) method was employed to account for exchange-  
130 correlation effects.[3, 4] Core-valence interactions were treated using the projected  
131 augmented wave (PAW) method.[5] A plane wave energy cutoff of 450 eV was set,  
132 and a 3×3×1 Monkhorst-Pack k-point grid was utilized for Brillouin zone sampling. To  
133 prevent periodic interactions, a vacuum space of 15 Å above the surfaces was adopted.  
134 The self-consistent calculations applied a convergence energy threshold of 10<sup>-5</sup> eV.  
135 The equilibrium geometries and lattice constants were optimized with maximum stress  
136 on each atom within 0.02 eV Å<sup>-1</sup>. Isosurface level of charge density difference of Cu-  
137 C<sub>3</sub>N<sub>4</sub>-S was set at 0.01 e Å<sup>-3</sup>. Density of states of Cu-C<sub>3</sub>N<sub>4</sub>-S, Cu-C<sub>3</sub>N<sub>4</sub>-B, Cu-C<sub>3</sub>N<sub>4</sub>-P,  
138 Cu-C<sub>3</sub>N<sub>4</sub>-S-CO, Cu-C<sub>3</sub>N<sub>4</sub>-B-CO, and Cu-C<sub>3</sub>N<sub>4</sub>-P-CO were both obtained by vaspkit  
139 interface.

140 In Gibbs free energy calculation, the elementary steps of C-C coupling reaction  
141 were described as:

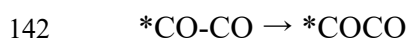

143 In reaction pathways, the sign of "\*" represents the bare surface. The sign of "-"  
144 represents the situation of intermediates which adsorbed on surface before C-C  
145 coupling. Besides, the Kelvin temperature T was set at 298.15K. Ezpe and TS were  
146 both obtained by vaspkit interface. pH value was set at 8 to simulate the weakly alkaline  
147 media medium.

148 The Gibbs free energy change ( $\Delta G$ ) of each step is determined using the formula:

149 
$$\Delta G = \Delta E + \Delta ZPE - T\Delta S$$

150 where  $\Delta E$  represents the electronic energy difference directly obtained from DFT  
151 calculations,  $\Delta ZPE$  is the zero-point energy difference, T is the room temperature  
152 (298.15 K) and  $\Delta S$  is the entropy change. The  $\Delta ZPE$  can be obtained following  
153 frequency calculations[6]:

154

$$\text{ZPE} = \frac{1}{2} \sum h\nu_i$$

155        Additionally, the TS values of adsorbed species are calculated according to the  
156 vibrational frequencies[7]:

$$TS = k_B T \left[ \sum_k \ln \left( \frac{1}{1 - e^{-h\nu_i/k_B T}} \right) + \sum_k \frac{h\nu_i}{k_B T} \frac{1}{(e^{h\nu_i/k_B T} - 1)} + 1 \right]$$

157

158

159

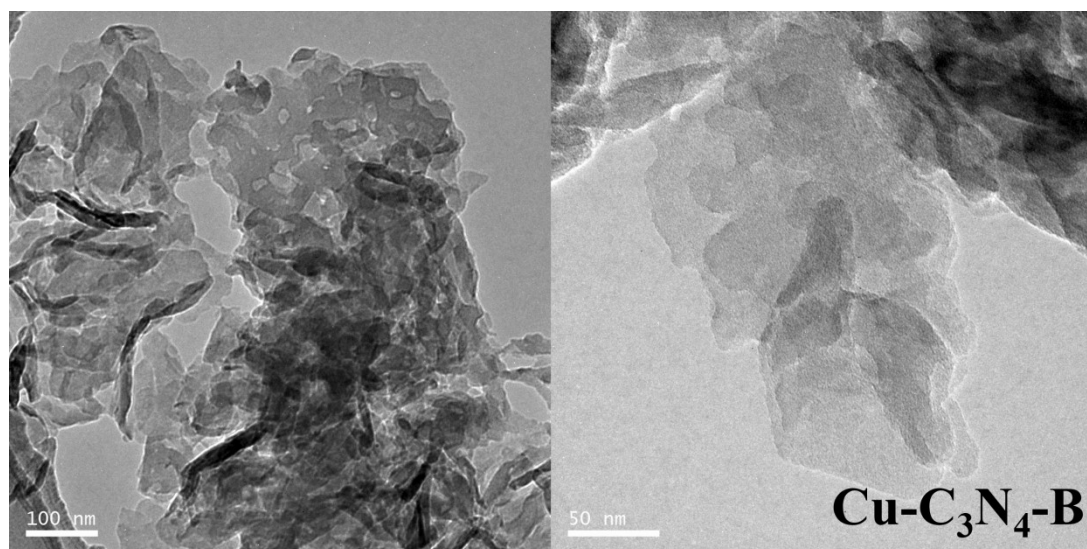

160

161 **Fig. S1.** FE-SEM and HR-TEM images of Cu-C<sub>3</sub>N<sub>4</sub>-B.

162



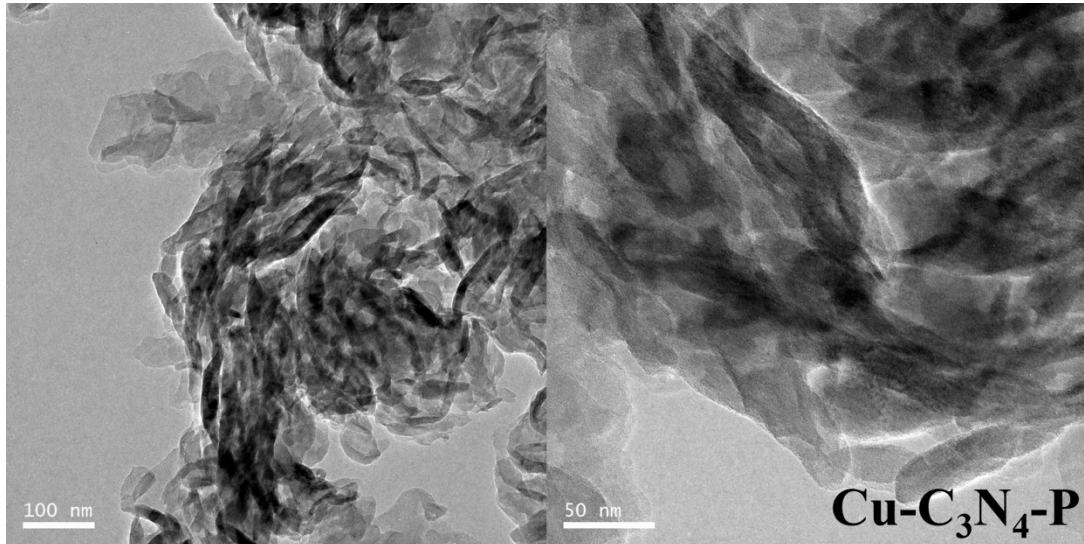

163

164 **Fig. S2.** FE-SEM and HR-TEM images of Cu-C<sub>3</sub>N<sub>4</sub>-P.

165

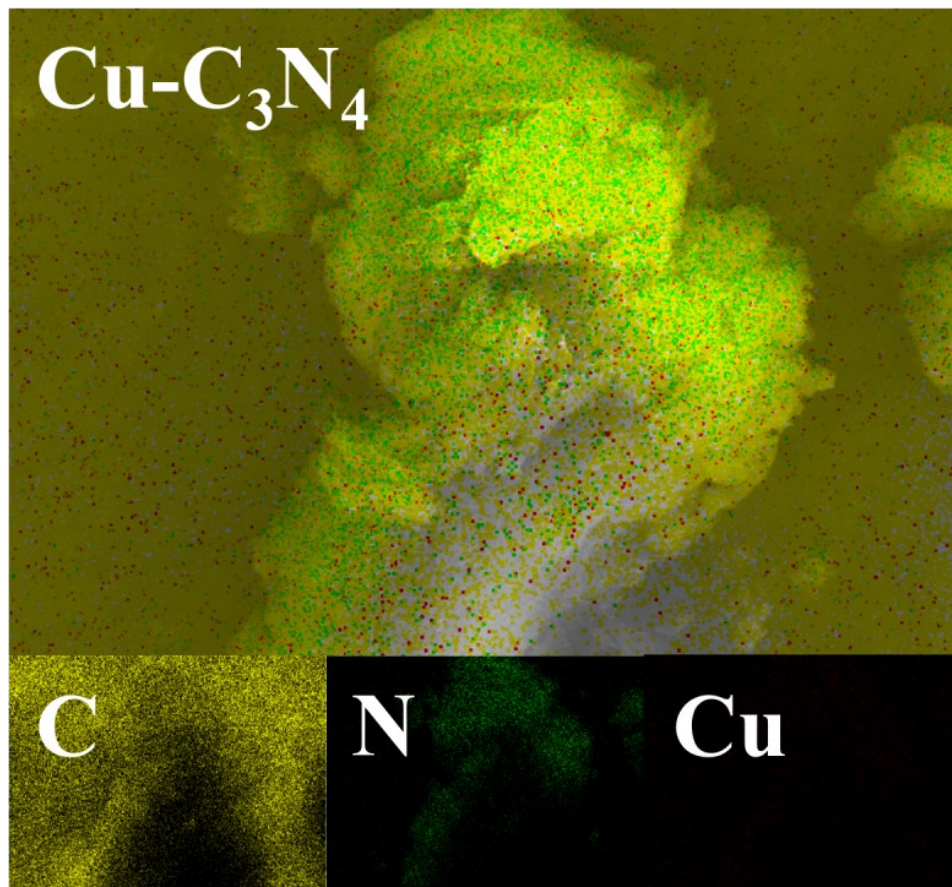

166

167 **Fig. S3.** HR-TEM and corresponding EDXs mapping images of Cu-C<sub>3</sub>N<sub>4</sub>.

168

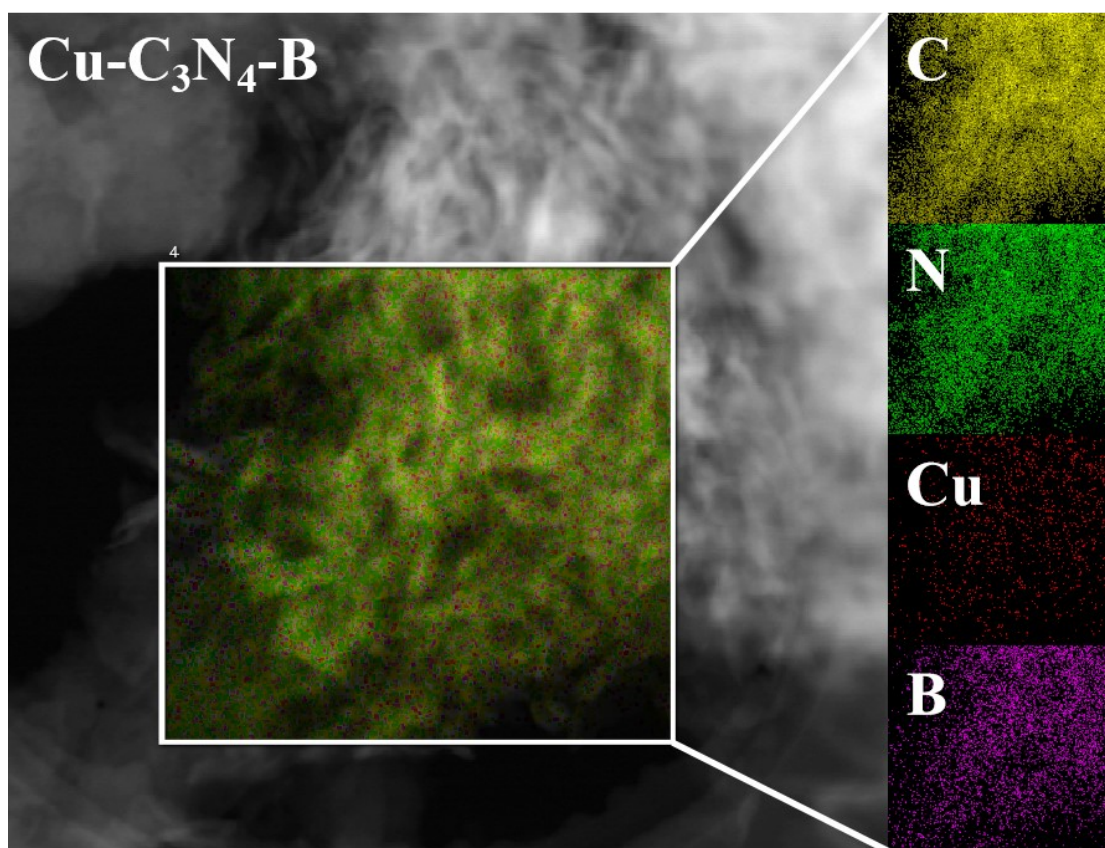

169

170 **Fig. S4.** HR-TEM and corresponding EDXs mapping images of Cu-C<sub>3</sub>N<sub>4</sub>-B.

171

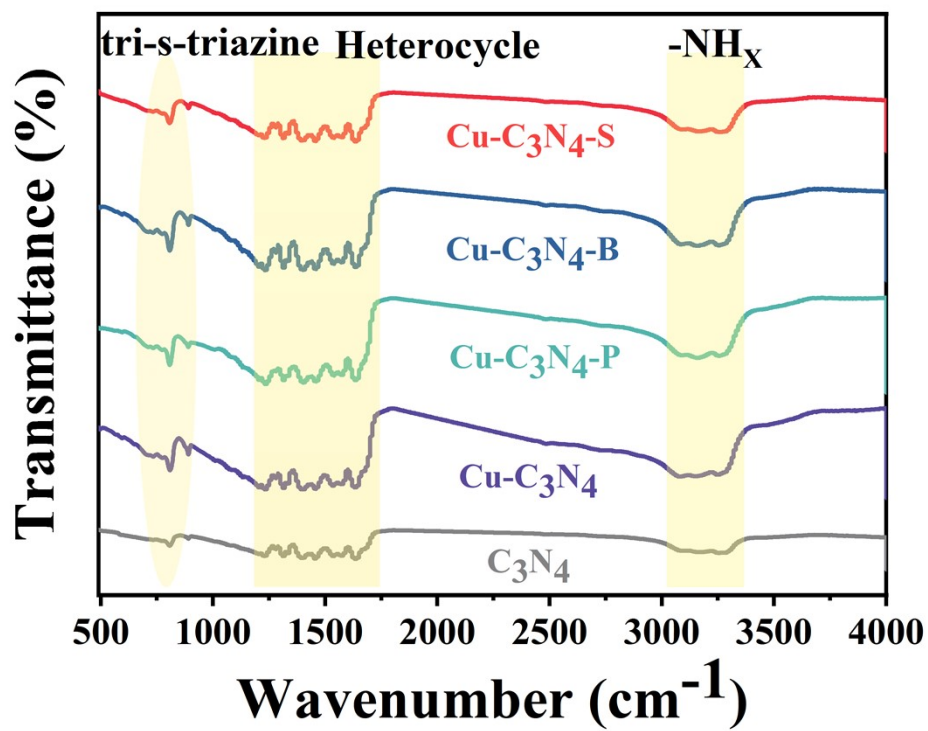

172

173 **Fig. S5.** FT-IR spectra of Cu-C<sub>3</sub>N<sub>4</sub>, C<sub>3</sub>N<sub>4</sub> and Cu-C<sub>3</sub>N<sub>4</sub>-HA.

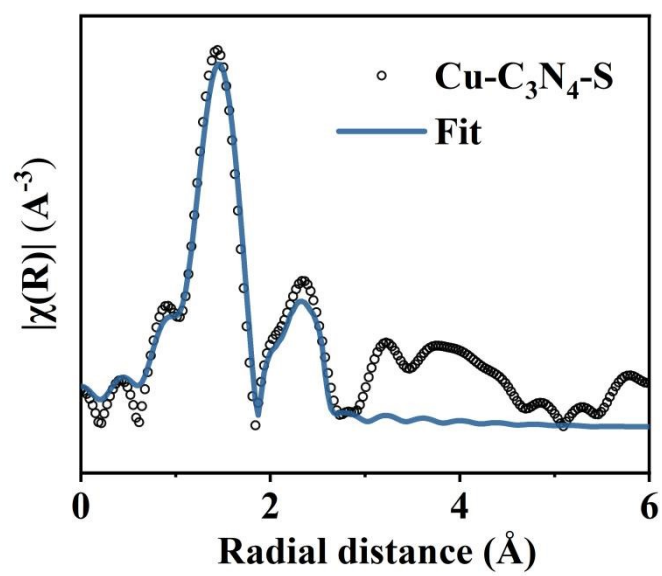

**Fig. S6.** Cu K-edge EXAFS fitting curves of Cu-C<sub>3</sub>N<sub>4</sub>-S.

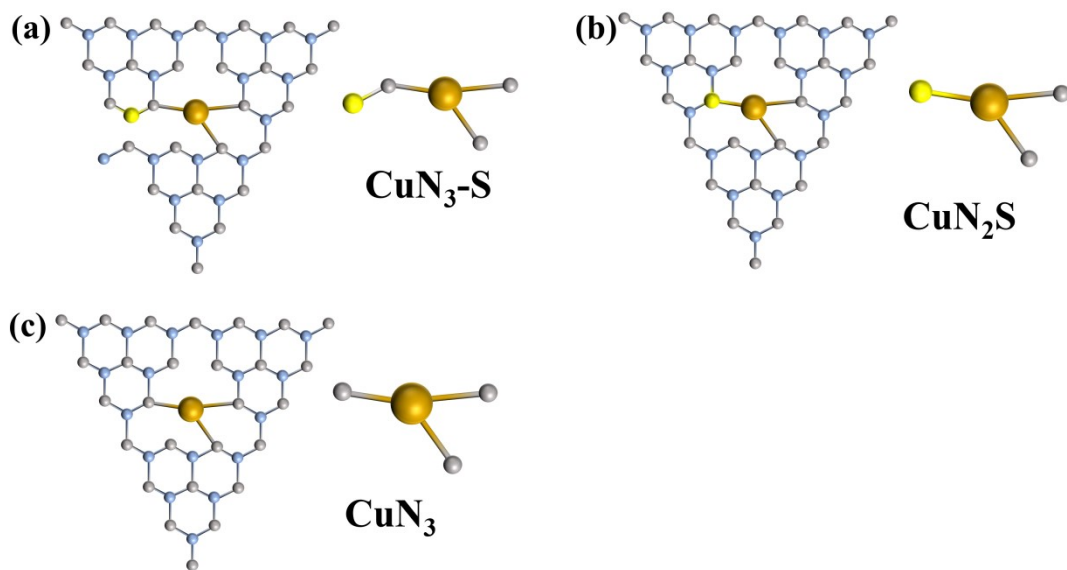

**Fig. S7.** The DFT calculation configurations of (a)  $\text{CuN}_3\text{-S}$ , (b)  $\text{CuN}_2\text{S}$ , and (c)  $\text{CuN}_3$  moieties embedded in a graphene sheet. Color scheme: grey for N, yellow for S, blue for C, and golden for Cu.

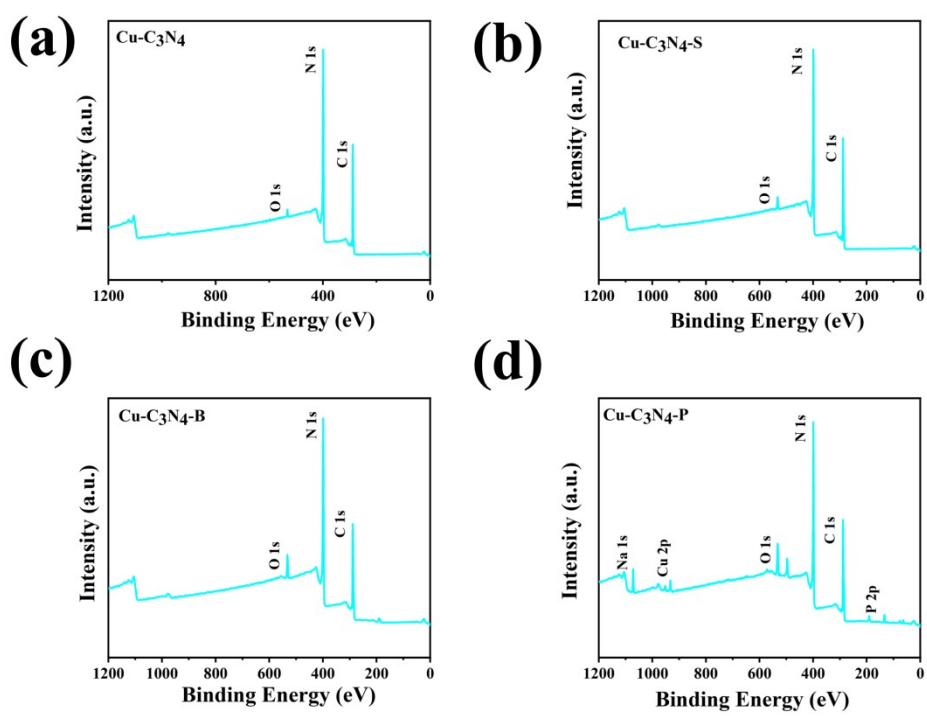

**Fig. S8.** (a-d) XPS spectra of Cu-C<sub>3</sub>N<sub>4</sub> and Cu-C<sub>3</sub>N<sub>4</sub>-HA.

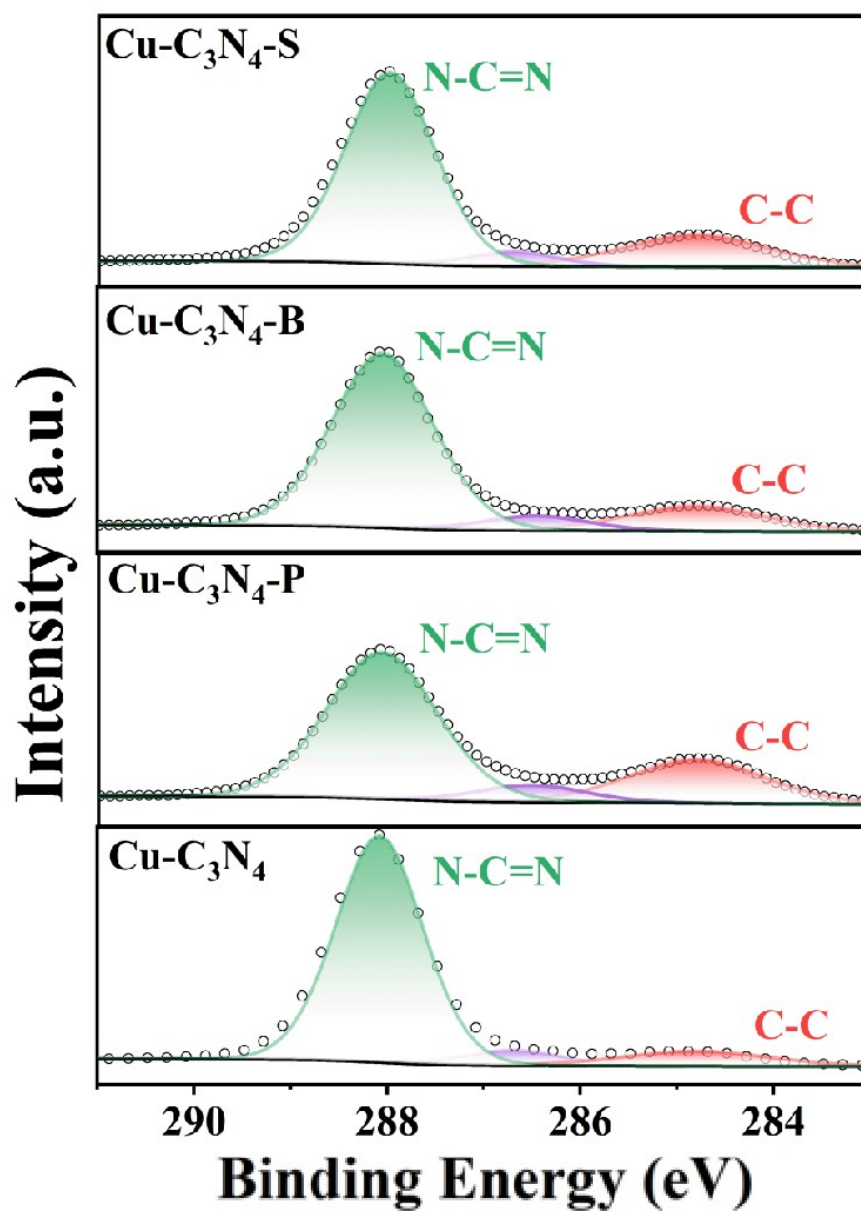

**Fig. S9.** High-resolution C 1s spectra of Cu-C<sub>3</sub>N<sub>4</sub> and Cu-C<sub>3</sub>N<sub>4</sub>-HA.



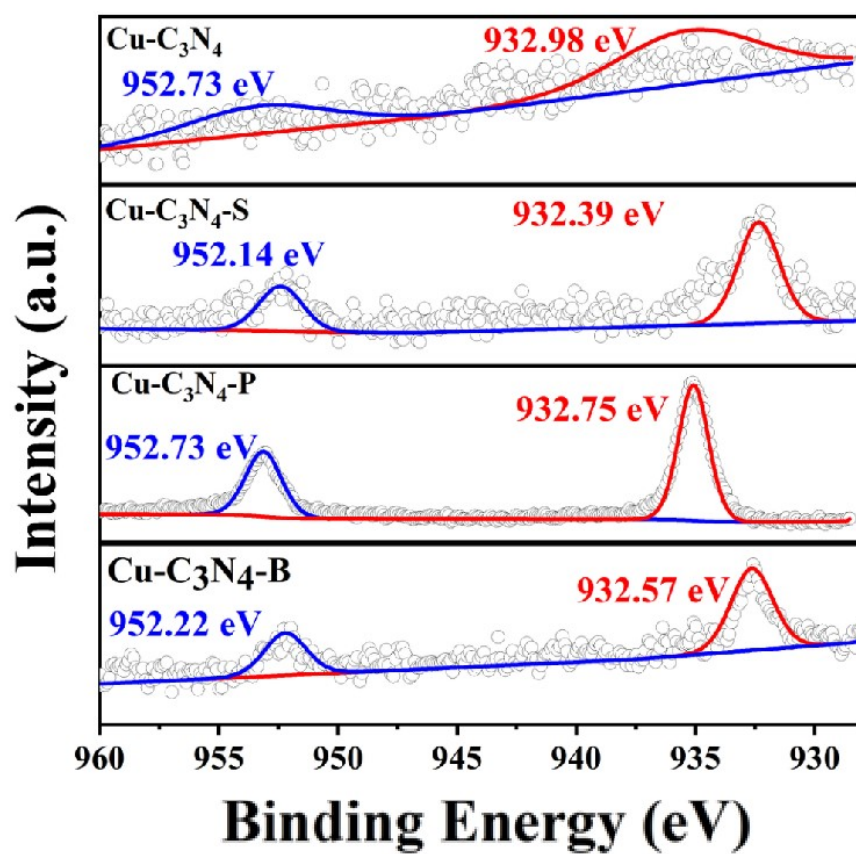

Fig. S10. High-resolution Cu 2p spectra of Cu-C<sub>3</sub>N<sub>4</sub> and Cu-C<sub>3</sub>N<sub>4</sub>-HA.

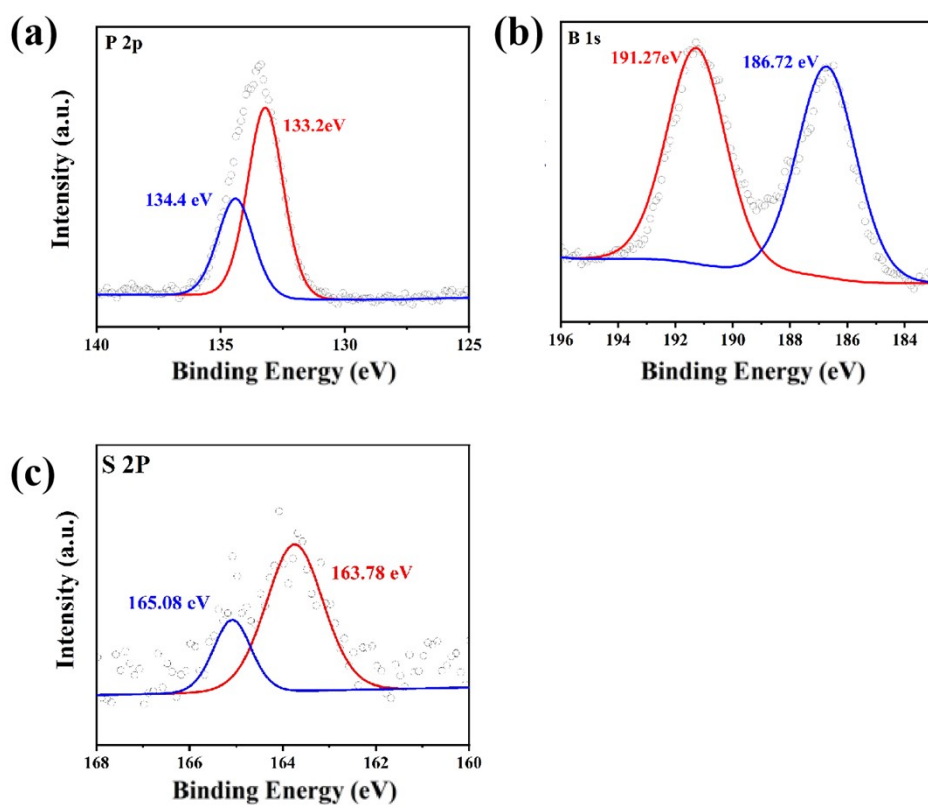

**Fig. S11.** (a) High-resolution P 2p spectra of Cu-C<sub>3</sub>N<sub>4</sub>-P. (b) High-resolution B 1s spectra of Cu-C<sub>3</sub>N<sub>4</sub>-B. (c) High-resolution S 2p spectra of Cu-C<sub>3</sub>N<sub>4</sub>-S.

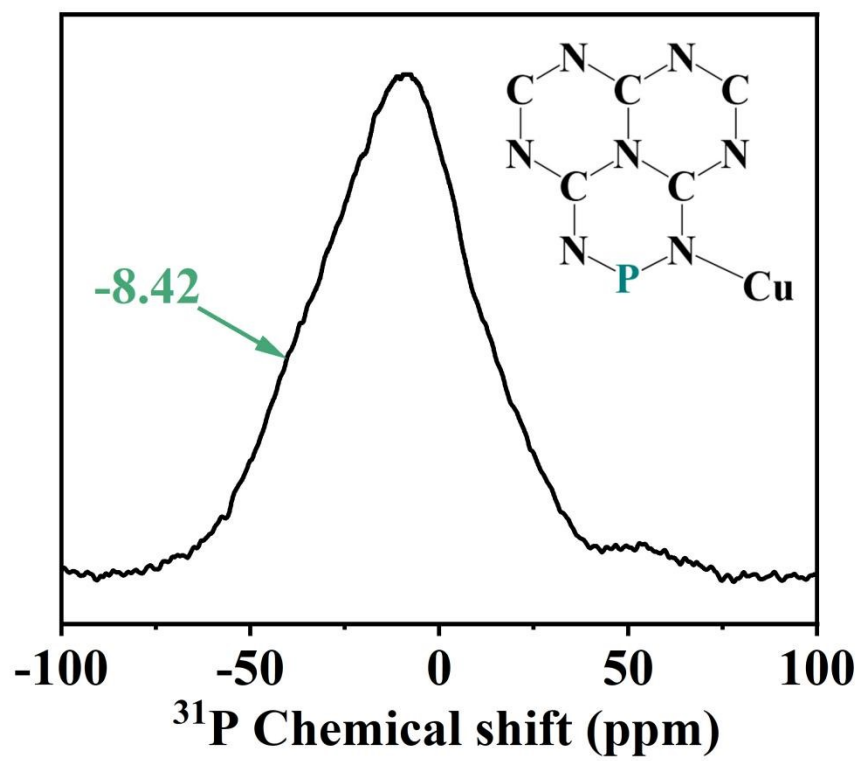

**Fig. S12.**  $^{31}\text{P}$  solid-state NMR spectrum of Cu-C<sub>3</sub>N<sub>4</sub>-P.

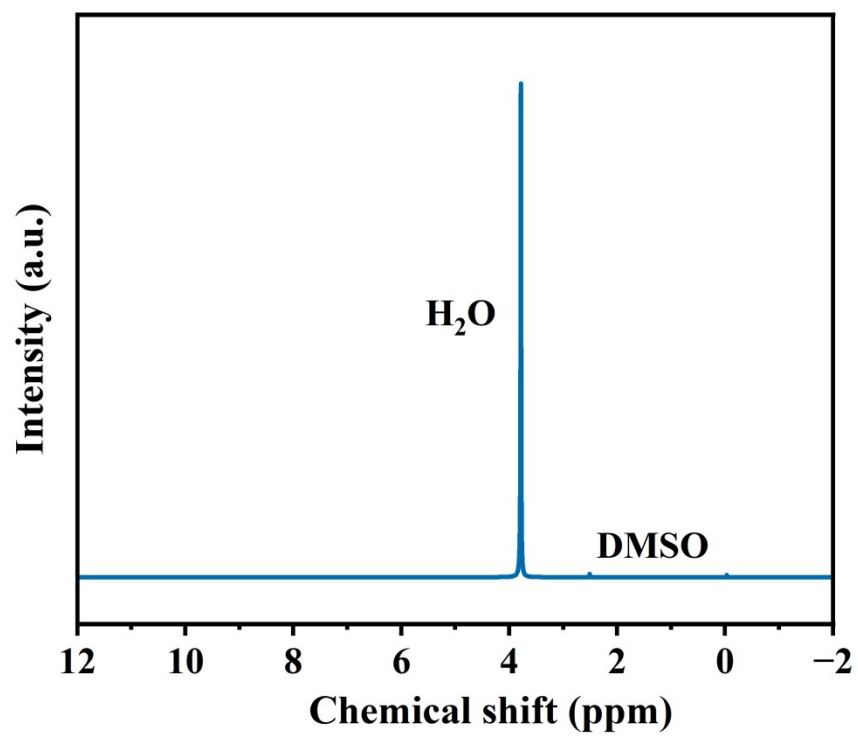

**Fig. S13.** <sup>1</sup>H NMR results of Cu-C<sub>3</sub>N<sub>4</sub>-HA after 2 h continuous CO<sub>2</sub>RR.

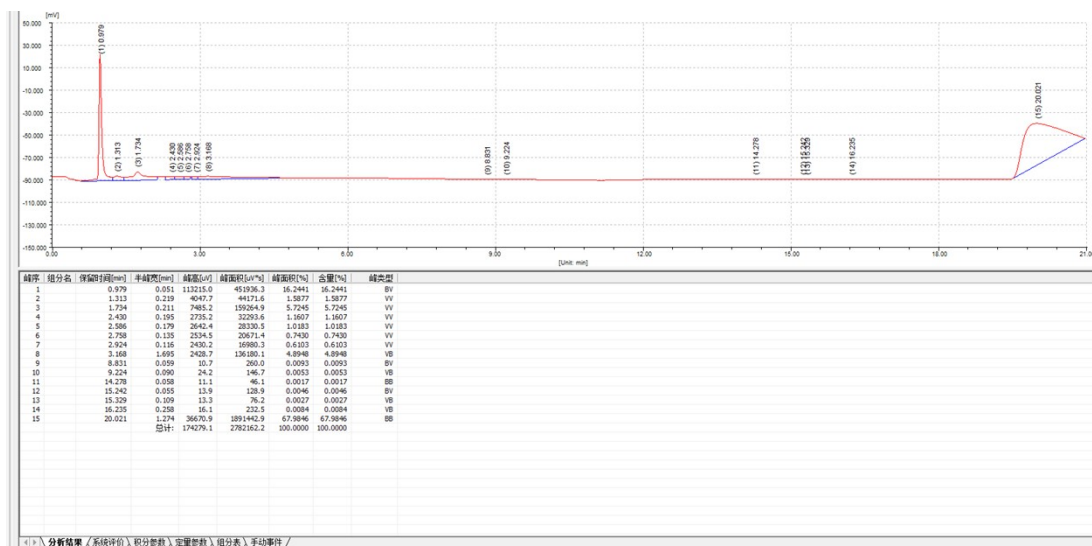

**Fig. S14.** The GC image of the reaction of Cu-C<sub>3</sub>N<sub>4</sub>-S with Ar as gas at -0.9 V vs. RHE. (H<sub>2</sub>:~1min)

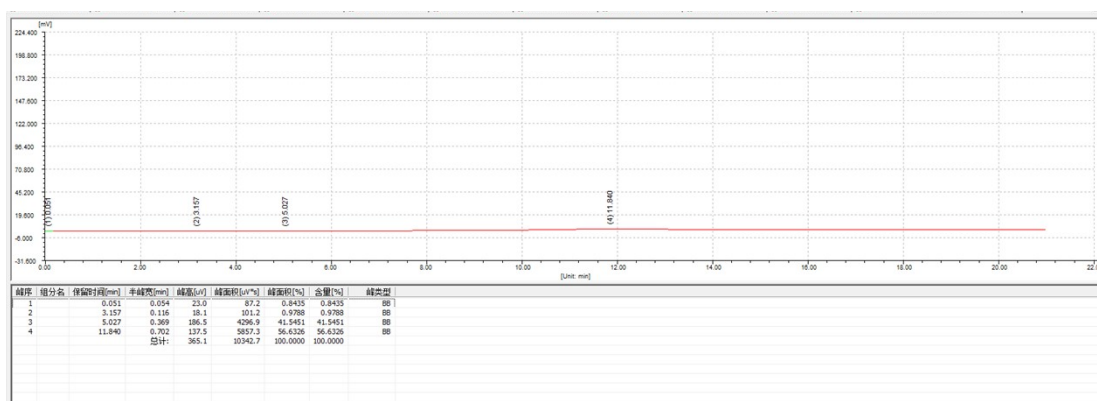

**Fig. S15.** The H<sub>2</sub> chromatogram of the reaction of Cu-C<sub>3</sub>N<sub>4</sub>-S with Ar as gas at -0.9 V vs. RHE.

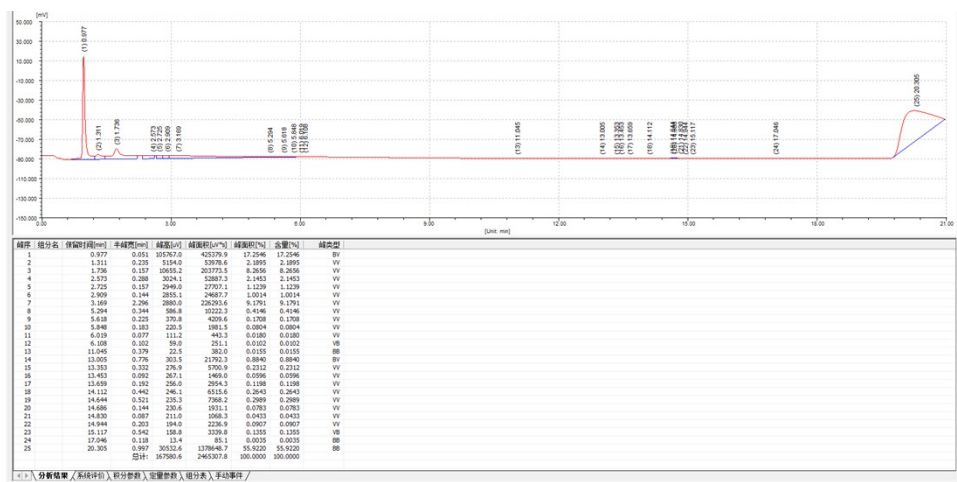

Fig. S16. The GC image of the reaction of  $C_3N_4$  with Ar as gas at  $-0.9$  V vs. RHE.

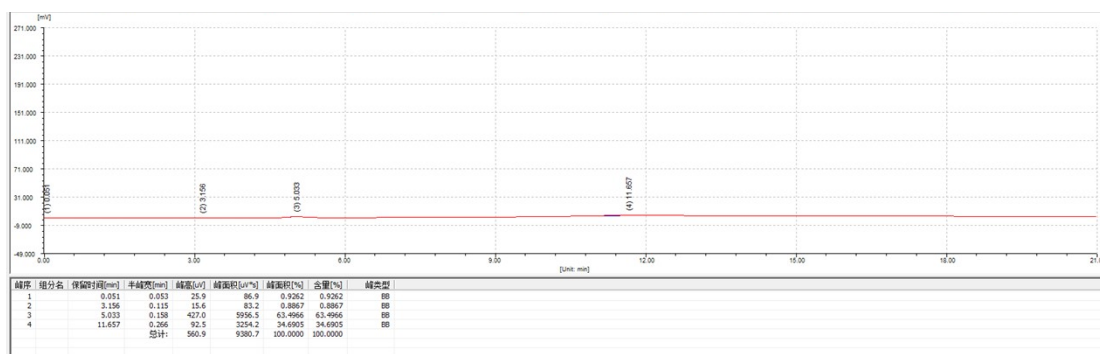

**Fig. S17.** The H<sub>2</sub> chromatogram of the reaction of C<sub>3</sub>N<sub>4</sub> with Ar as gas at -0.9 V vs. RHE. (H<sub>2</sub>:~1min)



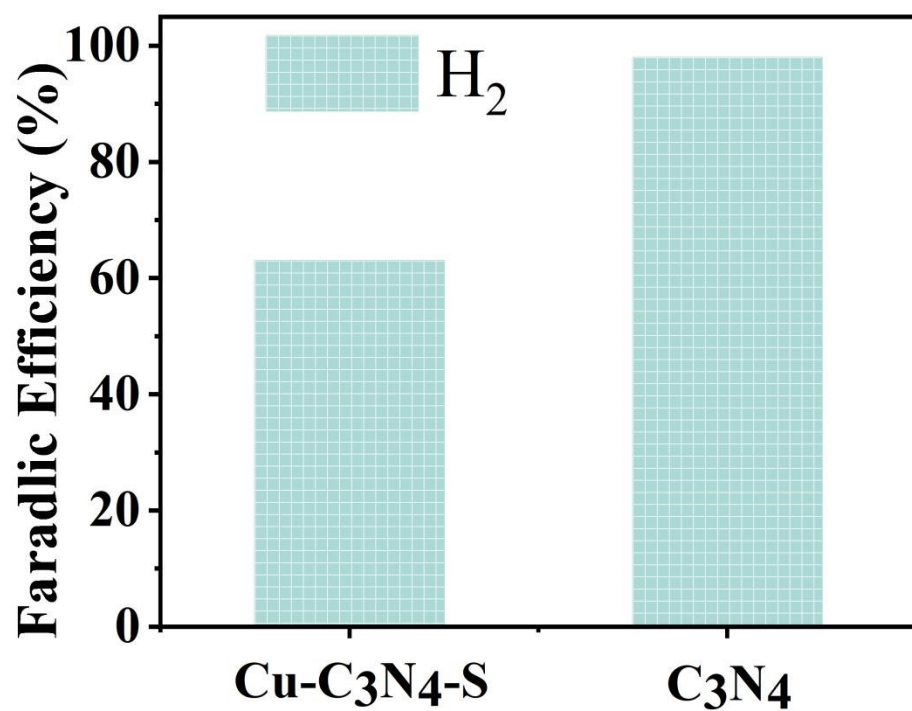

**Fig. S18.** The proportion of Cu-C<sub>3</sub>N<sub>4</sub>-S and C<sub>3</sub>N<sub>4</sub> products with Ar as gas at the potential of -0.9 V vs. RHE.

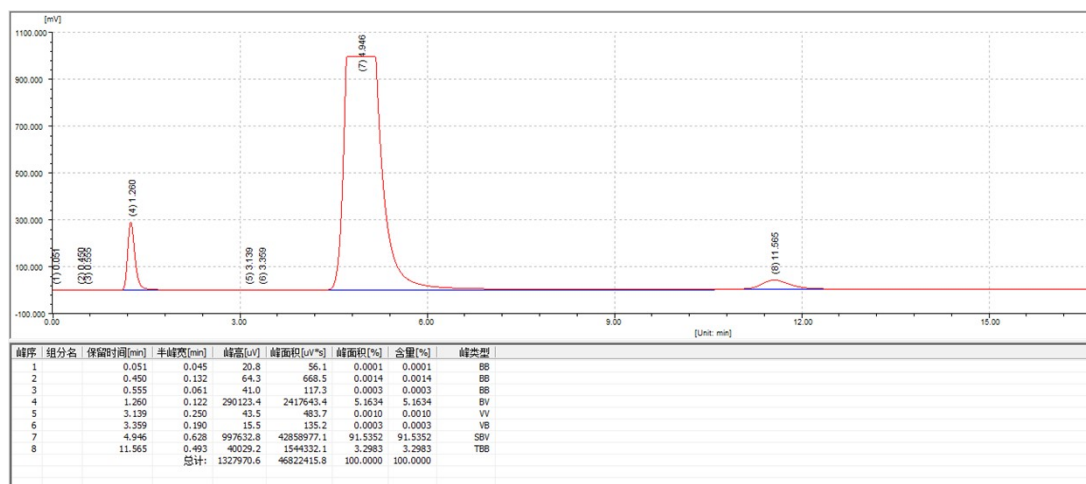

**Fig. S19.** The GC image of CO<sub>2</sub> reduction reaction for Cu-C<sub>3</sub>N<sub>4</sub>-S at -0.9 V vs. RHE. (CO: ~ 1.3 min, CH<sub>4</sub>: ~2.6 min and C<sub>2</sub>H<sub>4</sub>: ~ 11 min)

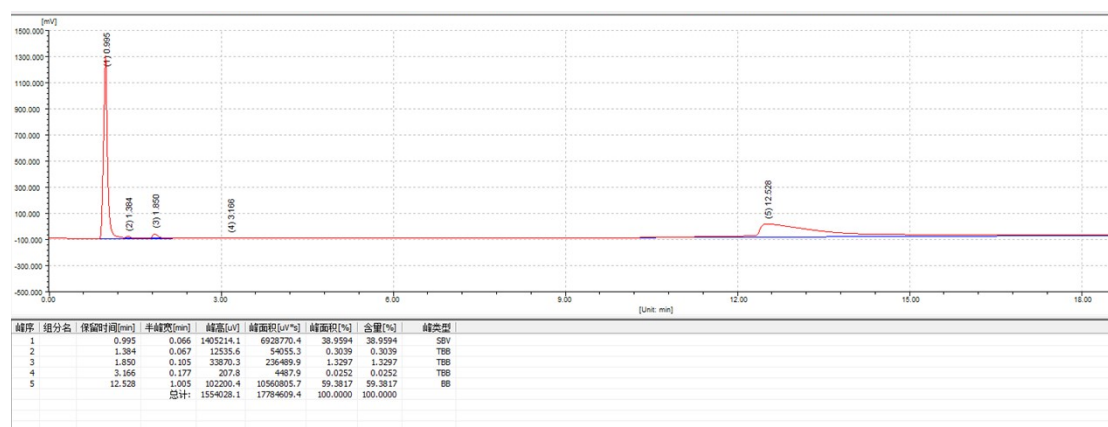

**Fig. S20.** The H<sub>2</sub> chromatograms of CO<sub>2</sub> reduction reaction for Cu-C<sub>3</sub>N<sub>4</sub>-S at -0.9 V vs. RHE. (H<sub>2</sub>: ~ 1min)

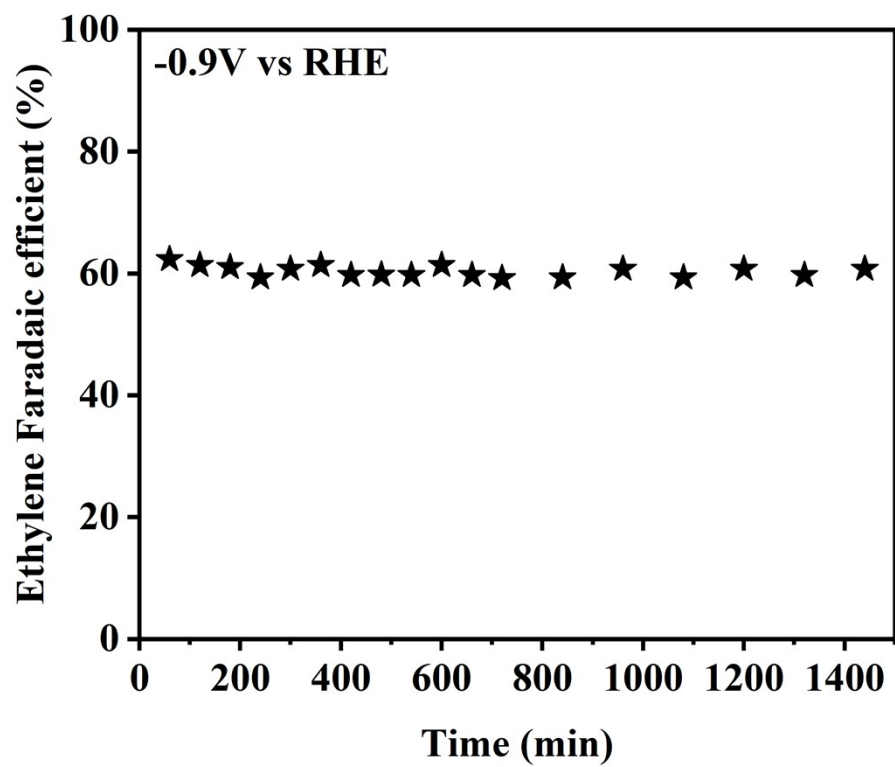

**Fig. S21.** Stability test for Cu<sub>10%</sub>-C<sub>3</sub>N<sub>4</sub>-S at -0.9 V vs. RHE with 1440 min of continuous.

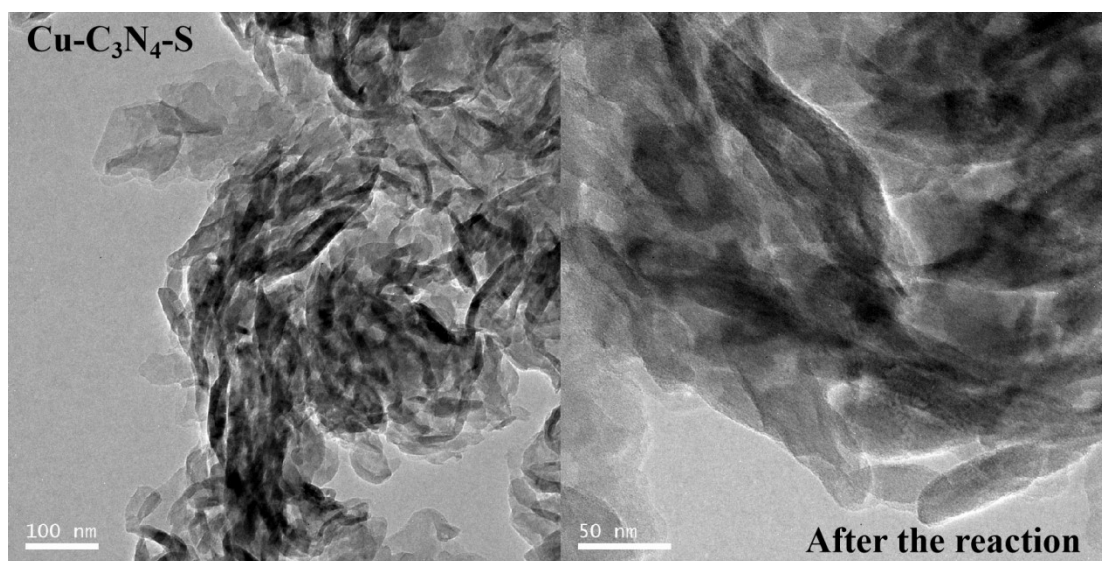

**Fig.S22.** HRTEM images of Cu-C<sub>3</sub>N<sub>4</sub>-S after the reaction.

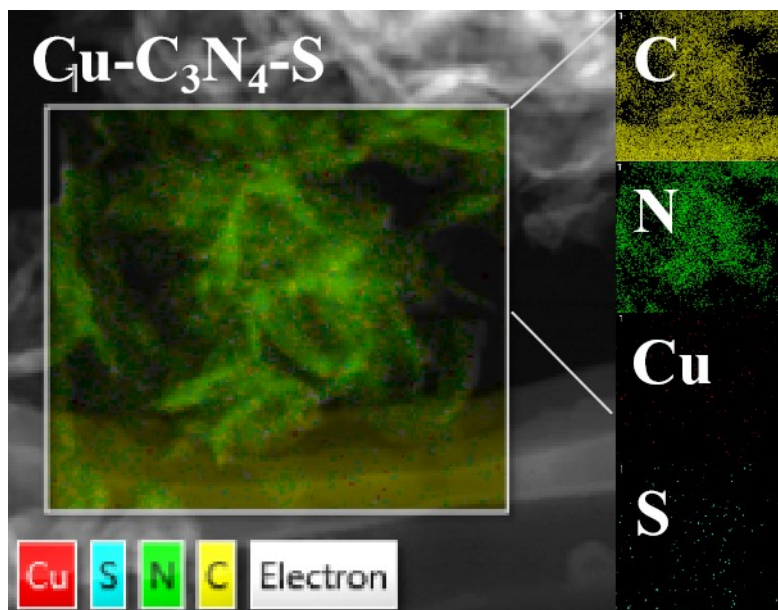

**Fig.S23.** HRTEM and corresponding EDX mapping images of Cu-C<sub>3</sub>N<sub>4</sub>-S after the reaction.

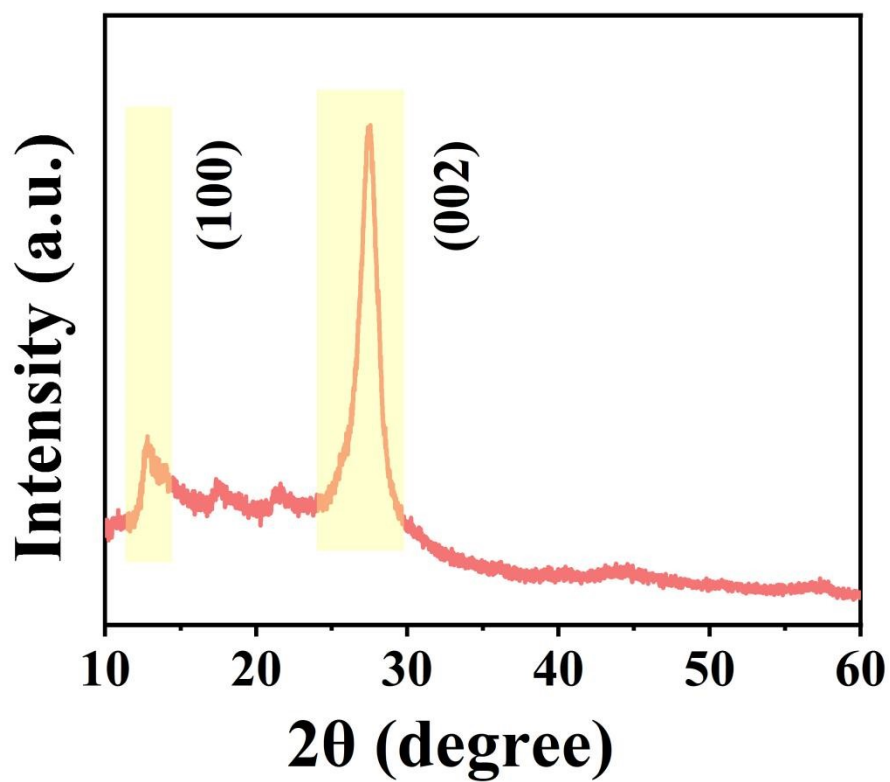

Fig. S24. XRD pattern of Cu-C<sub>3</sub>N<sub>4</sub>-S after the reaction.

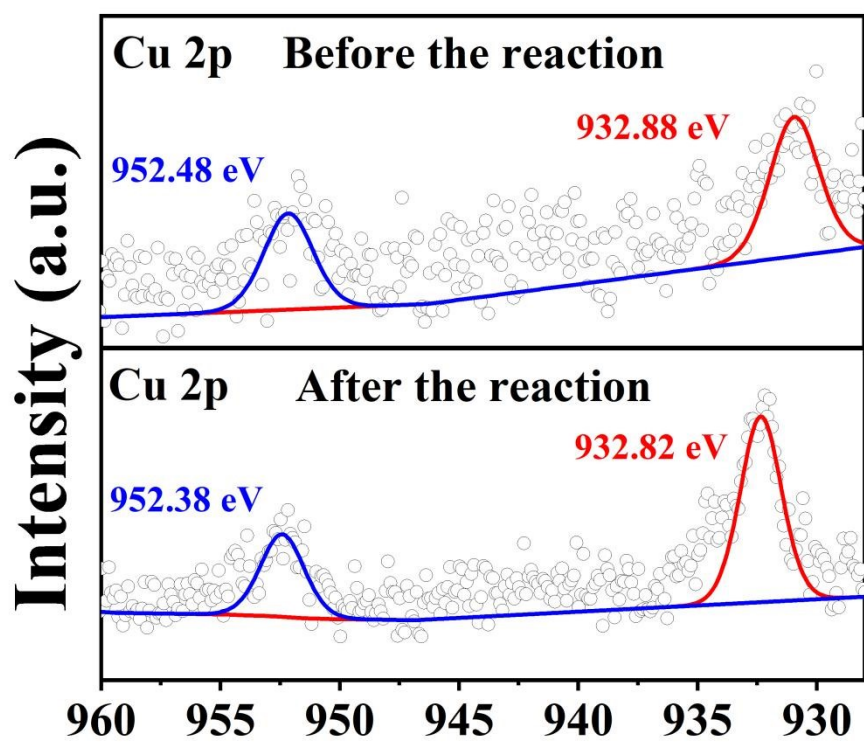

Fig. S25. High-resolution Cu 2p spectra of Cu-C<sub>3</sub>N<sub>4</sub>-S before and after the reaction.



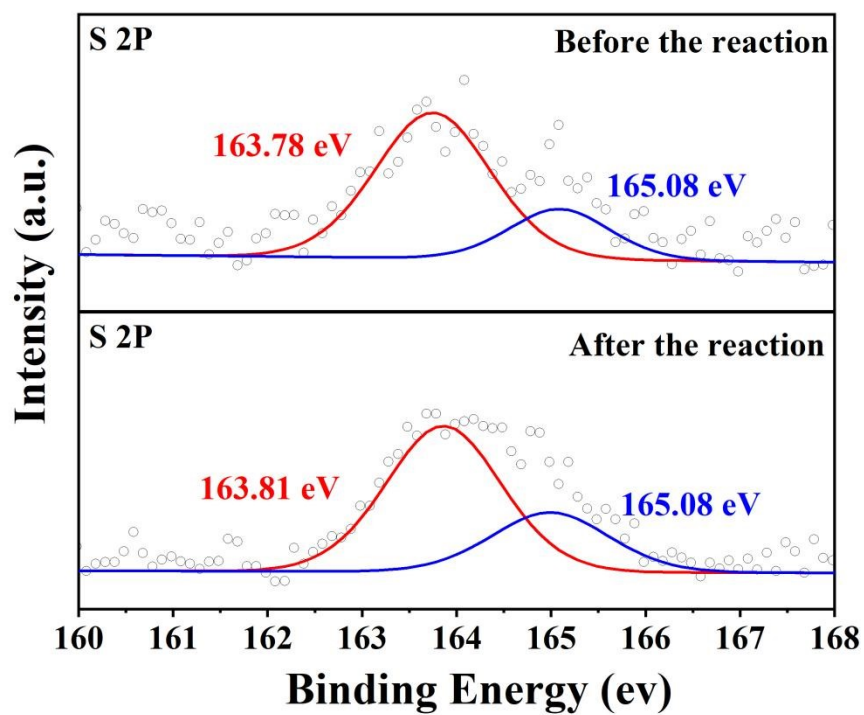

**Fig.S26.** High-resolution S 2p spectra of Cu-C<sub>3</sub>N<sub>4</sub>-S before and after the reaction.

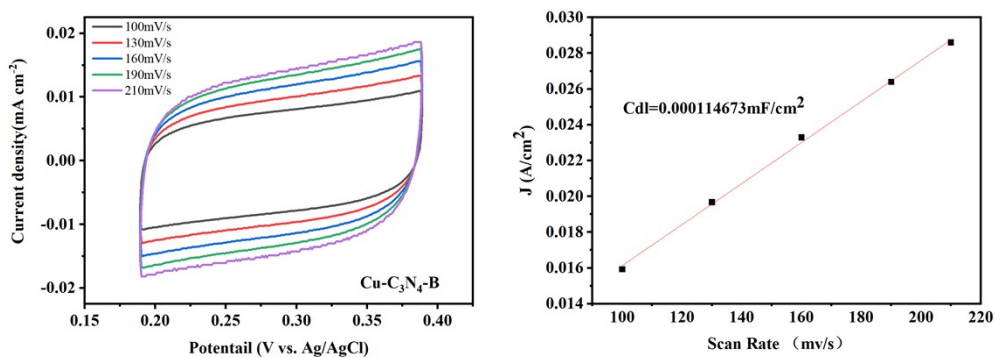

**Fig. S27.** The cyclic voltammograms measurements and the double-layer capacitance ( $C_{dl}$ ) were conducted at various scan rates (100, 130, 160, 190, 210  $\text{mV s}^{-1}$ ) on Cu- $\text{C}_3\text{N}_4\text{-B}$ .

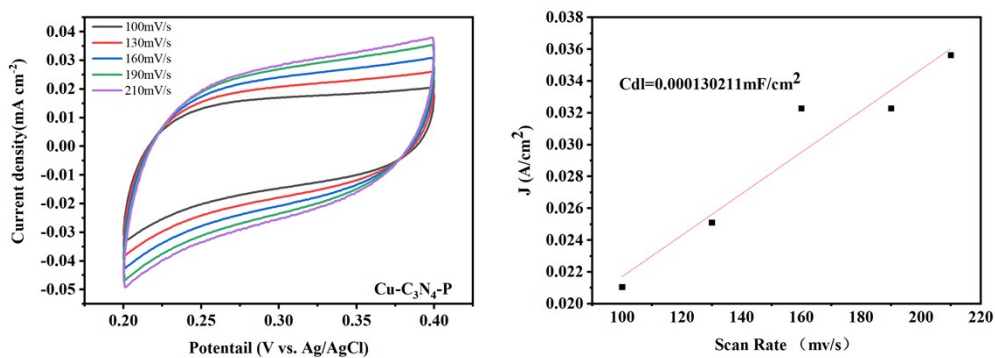

**Fig. S28.** The cyclic voltammograms measurements and the double-layer capacitance ( $C_{dl}$ ) were conducted at various scan rates (100, 130, 160, 190, 210  $\text{mV s}^{-1}$ ) on Cu-C<sub>3</sub>N<sub>4</sub>-P.

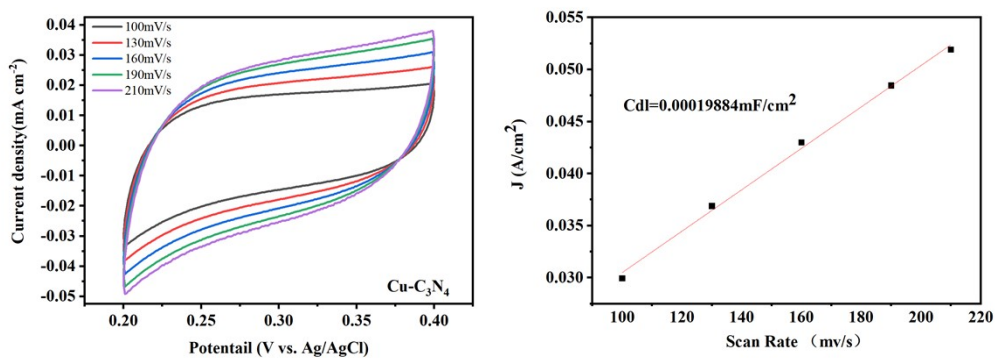

**Fig. S29.** The cyclic voltammograms measurements and the double-layer capacitance ( $C_{dl}$ ) were conducted at various scan rates (100, 130, 160, 190, 210  $\text{mV s}^{-1}$ ) on Cu- $\text{C}_3\text{N}_4$ .

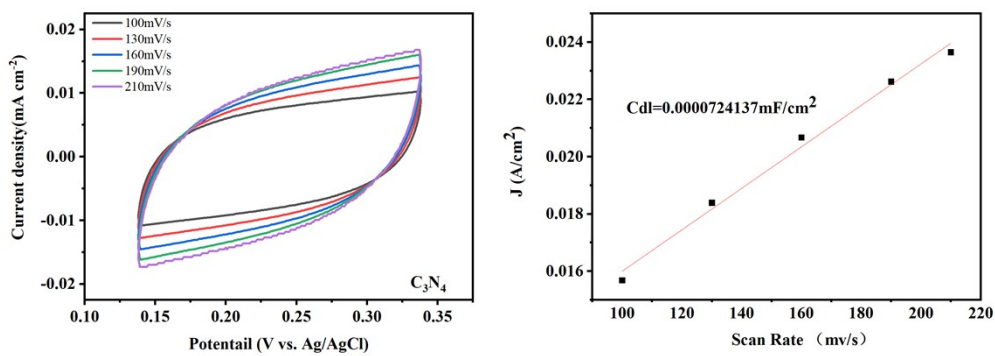

**Fig. S30.** The cyclic voltammograms measurements and the double-layer capacitance ( $C_{dl}$ ) were conducted at various scan rates (100, 130, 160, 190, 210  $\text{mV s}^{-1}$ ) on  $\text{C}_3\text{N}_4$ .

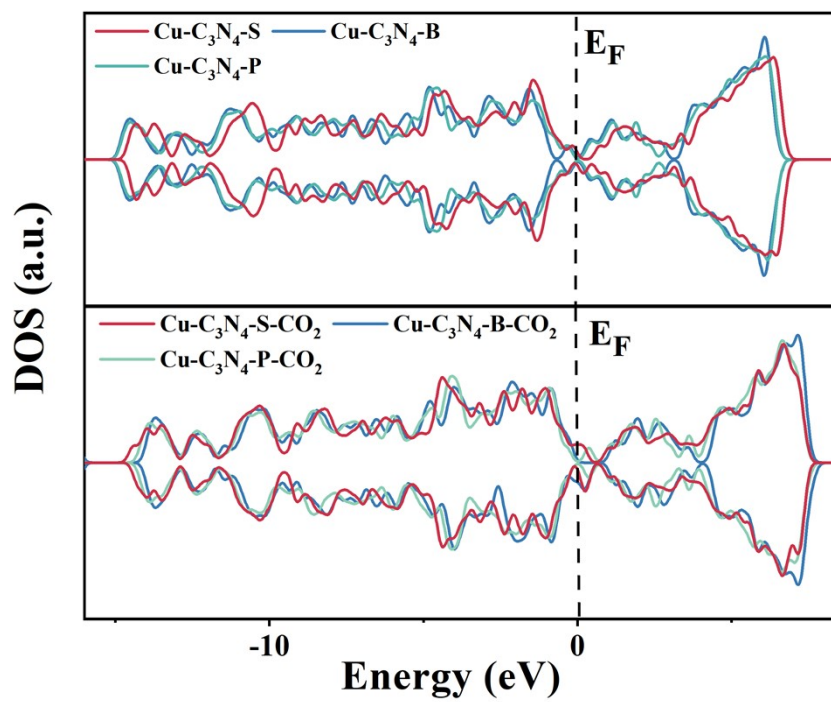

**Fig. S31.** The DOS of Cu-C<sub>3</sub>N<sub>4</sub>-HA before and after CO<sub>2</sub> absorption.

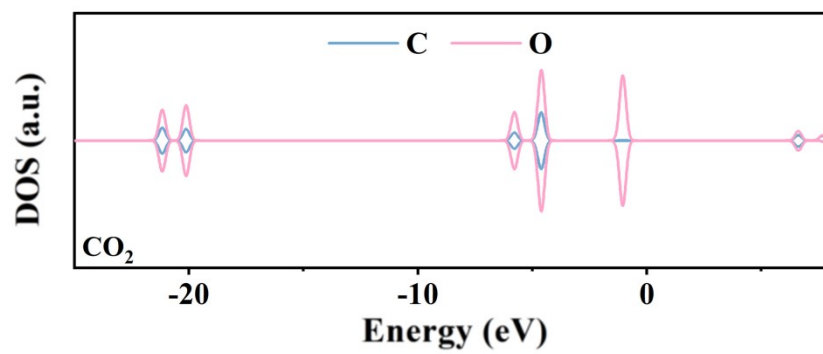

Fig. S32. The DOS of CO<sub>2</sub>.

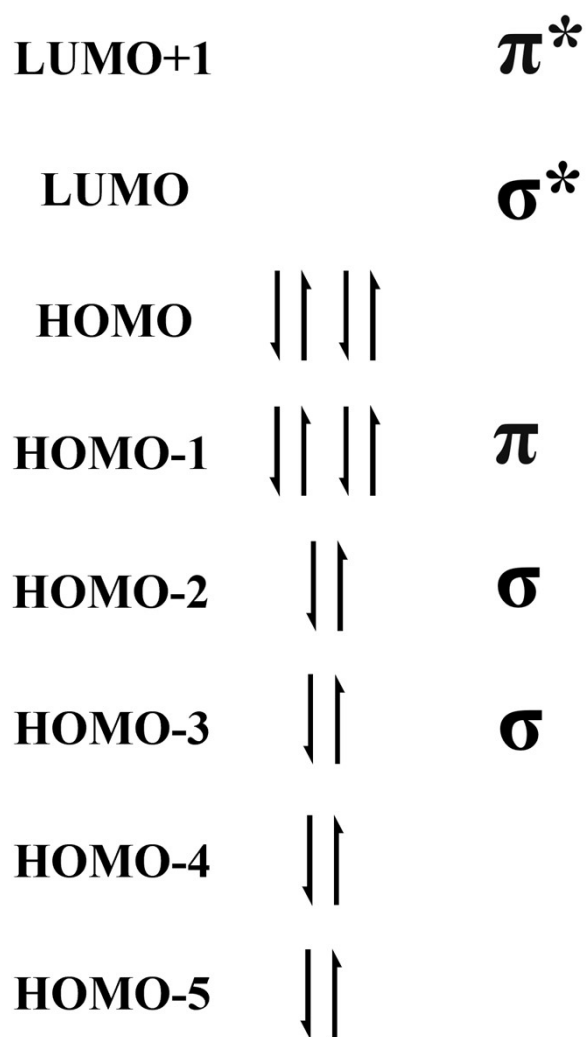

**Fig. S33.** The schematic representation of the molecular orbital diagram of CO<sub>2</sub>.



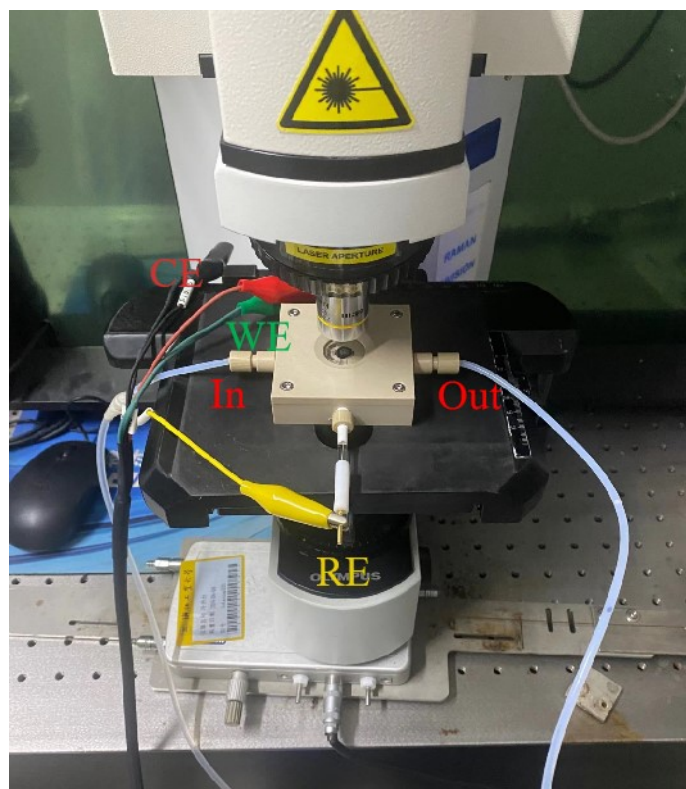

**Fig. S34.** Schematic representation of In-situ Raman device.

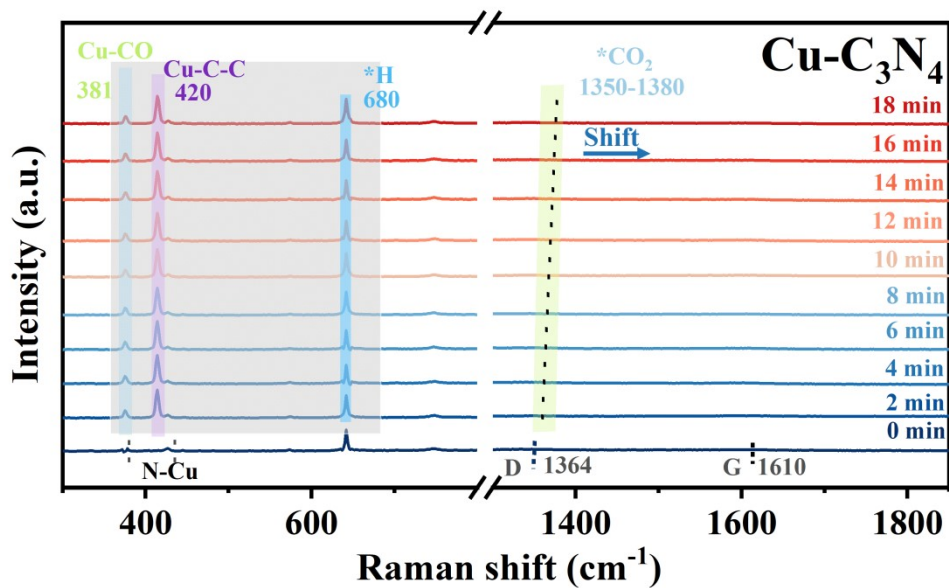

**Fig. S35.** Interval of 2 minutes in-situ Raman spectra under CO<sub>2</sub>RR conditions of Cu-C<sub>3</sub>N<sub>4</sub> from 300 to 1850 cm<sup>-1</sup>.

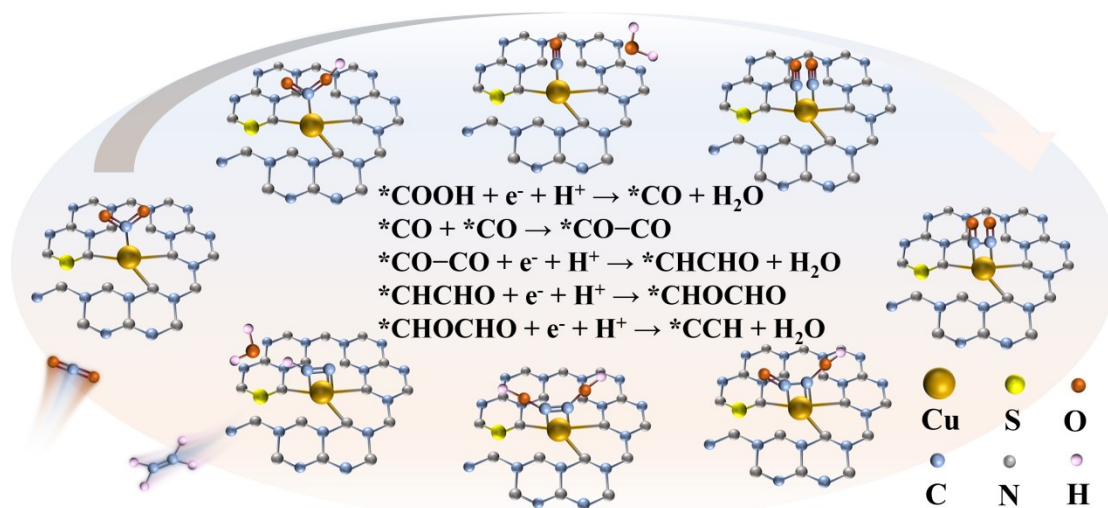

**Fig. S36.** Potential pathway of Cu-C<sub>3</sub>N<sub>4</sub>-S for the reduction of CO<sub>2</sub> to C<sub>2</sub>H<sub>4</sub>.

**Table S1.:** Concentrations of non-metallic elements in different Cu-C<sub>3</sub>N<sub>4</sub>-HA samples

| <b>Catalyst</b>                        | <b>S (%)</b> | <b>B (%)</b> | <b>P (%)</b> |
|----------------------------------------|--------------|--------------|--------------|
| <b>Cu-C<sub>3</sub>N<sub>4</sub>-S</b> | 4.4          | -            | -            |
| <b>Cu-C<sub>3</sub>N<sub>4</sub>-B</b> | -            | 4.2          | -            |
| <b>Cu-C<sub>3</sub>N<sub>4</sub>-P</b> | -            | -            | 2.8          |

**Table S2.** Fitted parameters of the Cu-C<sub>3</sub>N<sub>4</sub>-S.

| <b>Sample</b>                          | <b>Path</b> | <b>N<sup>a</sup></b> | <b>R (Å)<sup>b</sup></b> | <b>σ<sup>2</sup> (10<sup>-3</sup>Å<sup>2</sup>)<sup>c</sup></b> | <b>ΔE<sub>0</sub> (eV)<sup>d</sup></b> | <b>R-factor<sup>e</sup></b> |
|----------------------------------------|-------------|----------------------|--------------------------|-----------------------------------------------------------------|----------------------------------------|-----------------------------|
| <b>Cu-C<sub>3</sub>N<sub>4</sub>-S</b> | Cu-N        | 3.02                 | 2.01                     | 6.41                                                            | 2.14                                   | 0.019                       |

<sup>a</sup>N, coordination number; <sup>b</sup>R, distance between absorber and backscatter atoms; <sup>c</sup>σ<sup>2</sup>, Debye-Waller factor to account for both thermal and structural disorders; <sup>d</sup>ΔE<sub>0</sub>, inner potential correction; <sup>e</sup>R factor indicates the goodness of the fit.

**Table S3.** Comparison of the electroreduction CO<sub>2</sub> to C<sub>2</sub>H<sub>4</sub> performance for various catalysts.

| <b>Catalyst</b>                            | <b>FE<sub>C<sub>2</sub>H<sub>4</sub></sub> (%)</b> | <b>Potential (V vs. RHE)</b> | <b>Reference</b> |
|--------------------------------------------|----------------------------------------------------|------------------------------|------------------|
| <b>Cu-C<sub>3</sub>N<sub>4</sub>-S</b>     | <b>60.2</b>                                        | <b>-0.9</b>                  | <b>This Work</b> |
| Cu/HMCS <sub>5</sub> -10%                  | 68.6                                               | -1                           | [8]              |
| Cu-MOF-CF                                  | 48.6                                               | -1.11                        | [9]              |
| Pd-Cu <sub>2</sub> O                       | 63.8                                               | -1.1                         | [10]             |
| P-Cu-2                                     | 48.6                                               | -1.09                        | [11]             |
| 60-CuO/CeO <sub>2</sub>                    | 44.8                                               | -1.27                        | [12]             |
| Cu-KBr                                     | 52                                                 | -1.1                         | [13]             |
| OBC                                        | 45                                                 | -1                           | [14]             |
| La <sub>2</sub> CuO <sub>4</sub> NBs       | 60                                                 | -1                           | [15]             |
| PTF(Ni)/Cu                                 | 57.3                                               | -1.1                         | [16]             |
| Cu/Cu <sub>x</sub> S <sub>y</sub>          | 60                                                 | -1.32                        | [17]             |
| Cu <sub>3</sub> N NCs                      | 60                                                 | -1.6                         | [18]             |
| Cu-based NP/C                              | 57.3                                               | -1.1                         | [19]             |
| PcCu-Cu-O                                  | 50                                                 | -1.2                         | [20]             |
| CuPANI                                     | 40                                                 | -1.2                         | [21]             |
| Ag <sub>65</sub> -Cu <sub>35</sub> JNS-100 | 54                                                 | -1.2                         | [22]             |

## References

- [1] G. Kresse, J. Hafner, Ab initio molecular dynamics for liquid metals, *Phys. Rev. B* 47 (1993) 558-561.
- [2] G. Kresse, J. Hafner, Ab initio molecular-dynamics simulation of the liquid-metal-amorphous-semiconductor transition in germanium, *Phys. Rev. B* 49 (1994) 14251-14269.
- [3] J. P. Perdew, K. Burke, M. Ernzerhof, Generalized gradient approximation made simple. *Phys. Rev. Lett.* 77 (1996) 3865-3868.
- [4] G. Kresse, D. Joubert, Form ultrasoft pseudopotentials to the projector augmented-wave method. *Phys. Rev. B* 59 (1999) 1758-1775.
- [5] P.E. Blochl, Projector augmented-wave method, *Phys Rev B Condens Matter* 50 (1994) 17953-17979.
- [6] Nørskov JK, Rossmeisl J, Logadottir A, Lindqvist L, Kitchin JR, Bligaard T, Jonsson H. Origin of the overpotential for oxygen reduction at a fuel-cell cathode. *J. Phys. Chem. B* 108 (2004) 17886–17892.
- [7] Bendavid LI, Carter EA. CO<sub>2</sub> Adsorption on Cu<sub>2</sub>O (111): A DFT+U and DFT-D study, *J. Phys. Chem. C* 117 (2013), 26048–26059.
- [8] D.H. Nam, O. Shekhah, A. Ozden, C. McCallum, F. Li, X. Wang, Y. Lum, T. Lee, J. Li, J. Wicks, A. Johnston, D. Sinton, M. Eddaoudi, E.H. Sargent, High-rate and selective CO<sub>2</sub> electrolysis to ethylene via meta-organic-framework-augmented CO<sub>2</sub> availability, *Adv. Mater.* 34 (2022) 2207088.
- [9] T. Yan, P. Wang, W.Y. Sun, Single-site metal-organic framework and copper foil tandem catalyst for highly selective CO<sub>2</sub> electroreduction to C<sub>2</sub>H<sub>4</sub>, *Small* 19 (2022) 2206070.
- [10] D. Xiao, X. Bao, M. Zhang, Z. Li, Z. Wang, Y. Gao, Z. Zheng, P. Wang, H. Cheng, Y. Liu, Y. Dai, B. Huang, Stabilizing Cu<sub>2</sub>O for enhancing selectivity of CO<sub>2</sub> electroreduction to C<sub>2</sub>H<sub>4</sub> with the modification of Pd nanoparticles, *Chem. Eng. J.* 45 (2023) 139358.
- [11] J. Zhang, Z. Liu, H. Guo, H. Lin, H. Wang, X. Liang, H. Hu, Q. Xia, X. Zou, X. Huang, Selective, Stable Production of ethylene using a pulsed Cu-Based electrode, *ACS Appl. Mater. Inter.* 14 (2022) 19388-19396.
- [12] H.-D. Cai, B. Nie, P. Guan, Y.-S. Cheng, X.-D. Xu, F.-H. Wu, G. Yuan, X.-W. Wei, Tuning the interactions in CuO nanosheet-decorated CeO<sub>2</sub> nanorods for controlling the electrochemical reduction of CO<sub>2</sub> to methane or ethylene, *ACS Appl. Nano Mater.* 55 (2022) 7259-7267.
- [13] T. Kim, G.T.R. Palmore, A scalable method for preparing Cu electrocatalysts that convert CO<sub>2</sub> into C<sub>2+</sub> products, *Nat. Commun.* 111 (2020) 3622.
- [14] W. Zhang, C. Huang, Q. Xiao, L. Yu, L. Shuai, P. An, J. Zhang, M. Qiu, Z. Ren, Y. Yu, Atypical oxygen-bearing copper boosts ethylene selectivity toward electrocatalytic CO<sub>2</sub> Reduction, *J Am Chem Soc* 142 (2020) 11417-11427.
- [15] J. Wang, C. Cheng, B. Huang, J. Cao, L. Li, Q. Shao, L. Zhang, X. Huang, Grain-Boundary-Engineered La<sub>2</sub>CuO<sub>4</sub> Perovskite nanobamboos for efficient CO<sub>2</sub> reduction reaction, *Nano Lett.* 212 (2021) 980-987.
- [16] D.L. Meng, M.D. Zhang, D.H. Si, M.J. Mao, Y. Hou, Y.B. Huang, R. Cao, Highly selective tandem electroreduction of CO<sub>2</sub> to ethylene over atomically isolated nickel-nitrogen site/copper nanoparticle

catalysts, *Angew. Chem. Int. Ed.* 60 (2021) 25485-25492.

[17] C.F. Wen, M. Zhou, P.F. Liu, Y. Liu, X. Wu, F. Mao, S. Dai, B. Xu, X.L. Wang, Z. Jiang, P. Hu, S. Yang, H.F. Wang, H.G. Yang, Highly ethylene-selective electrocatalytic CO<sub>2</sub> reduction enabled by isolated Cu-S motifs in metal-organic framework based precatalysts, *Angew. Chem. Int. Ed.* 61 (2021) 25485-25492.

[18] Z. Yin, C. Yu, Z. Zhao, X. Guo, M. Shen, N. Li, M. Muzzio, J. Li, H. Liu, H. Lin, J. Yin, G. Lu, D. Su, S. Sun, Cu<sub>3</sub>N nanocubes for selective electrochemical reduction of CO<sub>2</sub> to ethylene, *Nano Lett.* 19 (2019) 8658-8663.

[19] H. Jung, S.Y. Lee, C.W. Lee, M.K. Cho, D.H. Won, C. Kim, H.S. Oh, B.K. Min, Y.J. Hwang, Electrochemical fragmentation of Cu<sub>2</sub>O nanoparticles enhancing selective C-C coupling from CO<sub>2</sub> reduction reaction, *J. Am. Chem. Soc.* 141 (2019) 4624-4633.

[20] X.-F. Qiu, H.-L. Zhu, J.-R. Huang, P.-Q. Liao, X.-M. Chen, Highly selective CO<sub>2</sub> electroreduction to C<sub>2</sub>H<sub>4</sub> using a metal-organic framework with dual active sites, *J. Am. Chem. Soc.* 143 (2021) 7242-7246.

[21] X. Wei, Z. Yin, K. Lyu, Z. Li, J. Gong, G. Wang, L. Xiao, J. Lu, L. Zhuang, Highly selective reduction of CO<sub>2</sub> to C<sub>2+</sub> hydrocarbons at copper/polyaniline interfaces, *ACS Catal.* 107 (2020) 4103-4111.

[22] Y. Ma, J. Yu, M. Sun, B. Chen, X. Zhou, C. Ye, Z. Guan, W. Guo, G. Wang, S. Lu, D. Xia, Y. Wang, Z. He, L. Zheng, Q. Yun, L. Wang, J. Zhou, P. Lu, J. Yin, Y. Zhao, Z. Luo, L. Zhai, L. Liao, Z. Zhu, R. Ye, Y. Chen, Y. Lu, S. Xi, B. Huang, C.S. Lee, Z. Fan, Confined growth of silver-copper janus nanostructures with {100} facets for highly selective tandem electrocatalytic carbon dioxide reduction, *Adv. Mater.* 34 (2022) 2110607.
